# Supplementary material
Source: HighWire-hosted journal article supplement (https://bmjopen.bmj.com/content/11/9/e042225)
Supplement: inline-supplementary-material-2 [file inline-supplementary-material-2.pdf]

**Supplementary Table 2 - Composite risk of contracting COVID-19 and mortality by pre-existing co-morbidity**

|                                            | Prevalence in COVID-19 <sup>1</sup> | Prevalence in population | Relative risk of contracting disease | Additional Risk of mortality (18) | Composite increased risk |
|--------------------------------------------|-------------------------------------|--------------------------|--------------------------------------|-----------------------------------|--------------------------|
| Chronic Cardiac Disease                    | 29%                                 | 14% <sup>2</sup>         | 2.07                                 | 1.31                              | 2.71                     |
| Uncomplicated diabetes                     | 19%                                 | 4.8% <sup>3</sup>        | 3.95                                 | N/A                               | 3.95                     |
| Chronic pulmonary disease excluding asthma | 16%                                 | 4.5% <sup>4</sup>        | 3.56                                 | 1.19                              | 4.2                      |
| Asthma                                     | 14%                                 | 8.3% <sup>5</sup>        | 2.15                                 | 1.19                              | 2.55                     |
| Dementia                                   | 10%                                 | 1.3% <sup>6</sup>        | 7.69                                 | 1.39                              | 6                        |
| Malignant neoplasm                         | 9%                                  | 1.5% <sup>7</sup>        | 6.00                                 | 1.19                              | 8.45                     |
| On Immunosuppressant therapy               | 9%                                  | 0.8% <sup>8</sup>        | 11.25                                | N/A                               | 11.25                    |
| Obesity (BMI>35kg/m <sup>2</sup> )         | 38.5%                               | 27.8% <sup>3</sup>       | 1.38                                 | 1.37                              | 1.90                     |
| Diabetes (with complications)              | 6%                                  | 1.2% <sup>3</sup>        | 5.00                                 | N/A                               | 5                        |

## Objective Risk Stratification tool for staff working with COVID-19

2

## References

1. Docherty AB, Harrison EM, Green CA, et al. Features of 16,749 hospitalised UK patients with COVID-19 using the ISARIC WHO Clinical Characterisation Protocol. *medRxiv* 2020: 2020.04.23.20076042.
2. NHS Digital. Health Survey for England 2017. 2018. Health Survey for England 2017 [NS] - NHS Digital (accessed 1st May 2020).
3. Diabetes UK. Facts and figures 2019. <https://www.diabetes.org.uk/professionals/position-statements-reports/statistics> (accessed 28th April 2020).
4. British Lung Foundation. The UK big picture 2019. <https://statistics.blf.org.uk/lung-disease-uk-big-picture> (accessed 28th April 2020).
5. Asthma UK. Facts and Figures. 2019. <https://www.asthma.org.uk/about/media/facts-and-statistics/> (accessed 28th April 2020).
6. Alzheimers UK. Dementia Statistics Hub 2018. <https://www.dementiastatistics.org/statistics-about-dementia/prevalence/> (accessed 28th April 2020).
7. Cancer Research UK. Cancer Statistics for the UK 2019. <https://www.cancerresearchuk.org/health-professional/cancer-statistics-for-the-uk> (accessed 28th April 2020).
8. Arthritis UK. The state of musculoskeletal health 2019. 2019. <https://www.versusarthritis.org/media/14594/state-of-musculoskeletal-health-2019.pdf> (accessed 28th April 2020).
